# Supplementary material for: Association between Chronotype, Physical Activity and Sedentary Behaviour: A Systematic Review
Source: MDPI journal article supplement (doi:10.3390/ijerph19159646), 2022-08-05
Supplement: s1 [file s1]

**Table S1.** Systematic search strategies

|                  |                                                                                                                                                                                                                                                                                                                                                                                                                                                                                                                    |
|------------------|--------------------------------------------------------------------------------------------------------------------------------------------------------------------------------------------------------------------------------------------------------------------------------------------------------------------------------------------------------------------------------------------------------------------------------------------------------------------------------------------------------------------|
| MEDLINE          | "Exercise"[MeSH Terms] AND ("chronotype"[All Fields] OR "chronotyped"[All Fields] OR "chronotypes"[All Fields])                                                                                                                                                                                                                                                                                                                                                                                                    |
|                  | ((("chronotype"[All Fields] OR "chronotyped"[All Fields] OR "chronotypes"[All Fields]) AND ("exercise"[MeSH Terms] OR "exercise"[All Fields] OR ("physical"[All Fields] AND "activity"[All Fields]) OR "physical activity"[All Fields])) AND (y_10[Filter])                                                                                                                                                                                                                                                        |
|                  | ((("chronotype"[All Fields] OR "chronotyped"[All Fields] OR "chronotypes"[All Fields]) AND ("prefer"[All Fields] OR "preferable"[All Fields] OR "preferably"[All Fields] OR "preferred"[All Fields] OR "preference"[All Fields] OR "preferences"[All Fields] OR "preferred"[All Fields] OR "preferring"[All Fields] OR "prefers"[All Fields]) AND ("exercise"[MeSH Terms] OR "exercise"[All Fields] OR ("physical"[All Fields] AND "activity"[All Fields]) OR "physical activity"[All Fields])) AND (y_10[Filter]) |
|                  | ((("acrophase"[All Fields] OR "acrophases"[All Fields]) AND ("chronotype"[All Fields] OR "chronotyped"[All Fields] OR "chronotypes"[All Fields]) AND ("exercise"[MeSH Terms] OR "exercise"[All Fields] OR ("physical"[All Fields] AND "activity"[All Fields]) OR "physical activity"[All Fields])) AND (y_10[Filter])                                                                                                                                                                                              |
|                  | ((("chronotype"[All Fields] OR "chronotyped"[All Fields] OR "chronotypes"[All Fields]) AND ("sedentaries"[All Fields] OR "sedentariness"[All Fields] OR "sedentary"[All Fields])) AND (y_10[Filter])                                                                                                                                                                                                                                                                                                               |
|                  | ("morningness"[All Fields] AND ("exercise"[MeSH Terms] OR "exercise"[All Fields] OR ("physical"[All Fields] AND "activity"[All Fields]) OR "physical activity"[All Fields])) AND (y_10[Filter])                                                                                                                                                                                                                                                                                                                    |
| Trip Database    | ("chronotype" OR chronotype preference ") AND ("physical activity")                                                                                                                                                                                                                                                                                                                                                                                                                                                |
|                  | ("morningness") AND ("physical activity")                                                                                                                                                                                                                                                                                                                                                                                                                                                                          |
| Psycinfo         | ("chronotype" OR chronotype preference ") AND ("physical activity")                                                                                                                                                                                                                                                                                                                                                                                                                                                |
|                  | ("morningness") AND ("physical activity")                                                                                                                                                                                                                                                                                                                                                                                                                                                                          |
| Cochrane Library | ("chronotype" OR chronotype preference ") AND ("physical activity")                                                                                                                                                                                                                                                                                                                                                                                                                                                |
|                  | ("morningness") AND ("physical activity")                                                                                                                                                                                                                                                                                                                                                                                                                                                                          |
