# Supplementary material for: Association between Chronotype, Physical Activity and Sedentary Behaviour: A Systematic Review
Source: MDPI journal article supplement (doi:10.3390/ijerph19159646), 2022-08-05
Supplement: s1 [file s1]

**Table S3.** Methodology quality assessment according to JIB checklist for cohort studies.

| Author<br>(year)      | Were the two groups similar and recruited from the same population ? | Were the exposures measured similarly to assign people to both exposed and unexposed groups? | Was the exposure measured in a valid and reliable way? | Were confounding factors identified? | Were strategies to deal with confounding factors stated? | Were the groups/participants free of the outcome at the start of the study (or at the moment of exposure)? | Were the outcomes measured in a valid and reliable way? | Was the follow up time reported and sufficient to be long enough for outcomes to occur? | Was follow up complete, and if not, were the reasons to loss to follow up described and explored? | Were strategies to address incomplete follow up utilized? | Was appropriate statistical analysis used? |
|-----------------------|----------------------------------------------------------------------|----------------------------------------------------------------------------------------------|--------------------------------------------------------|--------------------------------------|----------------------------------------------------------|------------------------------------------------------------------------------------------------------------|---------------------------------------------------------|-----------------------------------------------------------------------------------------|---------------------------------------------------------------------------------------------------|-----------------------------------------------------------|--------------------------------------------|
| Culnan et al.         | Y                                                                    | Y                                                                                            | Y                                                      | N                                    | N                                                        | Y                                                                                                          | Y                                                       | NA                                                                                      | NA                                                                                                | Y                                                         | Y                                          |
| Farkova et al.        | Y                                                                    | Y                                                                                            | Y                                                      | Y                                    | Y                                                        | Y                                                                                                          | Y                                                       | Y                                                                                       | N                                                                                                 | N                                                         | Y                                          |
| Huang et al.          | Y                                                                    | Y                                                                                            | Y                                                      | Y                                    | Y                                                        | N                                                                                                          | Y                                                       | NA                                                                                      | N                                                                                                 | N                                                         | Y                                          |
| Nauha et al.          | Y                                                                    | Y                                                                                            | Y                                                      | Y                                    | Y                                                        | Y                                                                                                          | Y                                                       | NA                                                                                      | NA                                                                                                | NA                                                        | Y                                          |
| Romero-Cabrera et al. | Y                                                                    | Y                                                                                            | Y                                                      | Y                                    | Y                                                        | Y                                                                                                          | Y                                                       | NA                                                                                      | NA                                                                                                | Y                                                         | Y                                          |

Y: Yes; N: No; NA: not-applicable
