# Supplementary material for: Association between Chronotype, Physical Activity and Sedentary Behaviour: A Systematic Review
Source: MDPI journal article supplement (doi:10.3390/ijerph19159646), 2022-08-05
Supplement: s1 [file s1]

**Table S2.** Methodology quality assessment according to JIB checklist for cross-sectional studies.

| Author (year)    | Were the criteria for inclusion in the sample clearly defined? | Were the study subjects and the setting described in detail? | Was the exposure measured in a valid and reliable way? | Were objective, standard criteria used for measurement of the condition? | Were confounding factors identified? | Were strategies to deal with confounding factors stated? | Were the outcomes measured in a valid and reliable way? | Was appropriate statistical analysis used? |
|------------------|----------------------------------------------------------------|--------------------------------------------------------------|--------------------------------------------------------|--------------------------------------------------------------------------|--------------------------------------|----------------------------------------------------------|---------------------------------------------------------|--------------------------------------------|
| Barrea et al.    | Y                                                              | Y                                                            | Y                                                      | Y                                                                        | Y                                    | N                                                        | Y                                                       | Y                                          |
| Bodur et al.     | Y                                                              | Y                                                            | Y                                                      | Y                                                                        | Y                                    | Y                                                        | Y                                                       | Y                                          |
| Gubelman et al.  | Y                                                              | Y                                                            | Y                                                      | Y                                                                        | Y                                    | Y                                                        | Y                                                       | Y                                          |
| Haraszki et al.  | Y                                                              | Y                                                            | Y                                                      | Y                                                                        | Y                                    | N                                                        | Y                                                       | Y                                          |
| Henson et al.    | Y                                                              | Y                                                            | Y                                                      | Y                                                                        | Y                                    | N                                                        | Y                                                       | Y                                          |
| Hisler et al.    | Y                                                              | Y                                                            | Y                                                      | Y                                                                        | N                                    | N                                                        | Y                                                       | Y                                          |
| Laborde et al.   | Y                                                              | Y                                                            | Y                                                      | Y                                                                        | Y                                    | Y                                                        | Y                                                       | Y                                          |
| Makarem et al.   | Y                                                              | Y                                                            | Y                                                      | Y                                                                        | Y                                    | N                                                        | Y                                                       | Y                                          |
| Mota et al.      | Y                                                              | Y                                                            | Y                                                      | Y                                                                        | Y                                    | N                                                        | Y                                                       | Y                                          |
| Oliveira et al.  | Y                                                              | Y                                                            | Y                                                      | Y                                                                        | Y                                    | N                                                        | Y                                                       | Y                                          |
| Patterson et al. | Y                                                              | Y                                                            | Y                                                      | Y                                                                        | Y                                    | N                                                        | Y                                                       | Y                                          |
| Shechter et al.  | Y                                                              | Y                                                            | Y                                                      | Y                                                                        | Y                                    | N                                                        | Y                                                       | Y                                          |
| Suh et al.       | Y                                                              | Y                                                            | Y                                                      | Y                                                                        | N                                    | N                                                        | Y                                                       | Y                                          |
| Thapa et al.     | Y                                                              | Y                                                            | Y                                                      | Y                                                                        | Y                                    | N                                                        | Y                                                       | Y                                          |
| Vera et al.      | N                                                              | Y                                                            | Y                                                      | Y                                                                        | Y                                    | N                                                        | Y                                                       | Y                                          |
| Wennman et al.   | Y                                                              | Y                                                            | Y                                                      | Y                                                                        | Y                                    | N                                                        | Y                                                       | Y                                          |
| Whittier et al.  | Y                                                              | Y                                                            | Y                                                      | Y                                                                        | Y                                    | N                                                        | Y                                                       | Y                                          |

| Author (year) | Were the criteria for inclusion in the sample clearly defined? | Were the study subjects and the setting described in detail? | Was the exposure measured in a valid and reliable way? | Were objective, standard criteria used for measurement of the condition? | Were confounding factors identified? | Were strategies to deal with confounding factors stated? | Were the outcomes measured in a valid and reliable way? | Was appropriate statistical analysis used? |
|---------------|----------------------------------------------------------------|--------------------------------------------------------------|--------------------------------------------------------|--------------------------------------------------------------------------|--------------------------------------|----------------------------------------------------------|---------------------------------------------------------|--------------------------------------------|
| Zhang et al.  | Y                                                              | Y                                                            | Y                                                      | Y                                                                        | Y                                    | Y                                                        | Y                                                       | Y                                          |

Y: YES, N: NO.
